# Supplementary material for: Performance of 18F-FDG PET/CT in Selecting Thyroid Nodules with Indeterminate Fine-Needle Aspiration Cytology for Surgery. A Systematic Review and a Meta-Analysis
Source: MDPI journal article supplement (doi:10.3390/jcm8091333), 2019-08-28
Supplement: s1 [file s1]

## Supplemental data

**Table S1:** Final diagnosis of included malignant thyroid nodules.

| First author, year     | Papillary thyroid carcinoma (n) | Follicular thyroid carcinoma (n) | Hürthle cell carcinoma (n) | Medullary thyroid carcinoma (n) | Low differentiated carcinoma (n) | Anaplastic carcinoma (n) | Overall (n) |
|------------------------|---------------------------------|----------------------------------|----------------------------|---------------------------------|----------------------------------|--------------------------|-------------|
| Mitchell, 2005 [34]    | 1                               | 0                                | 0                          | 0                               | 0                                | 0                        | 1           |
| Hales, 2008 [35]       | 8                               | 0                                | 0                          | 0                               | 0                                | 0                        | 8           |
| Deandreis, 2012 [36]   | 7                               | 3                                | 0                          | 0                               | 0                                | 0                        | 10          |
| Muñoz Pérez, 2013 [37] | 9                               | 0                                | 3                          | 1                               | 0                                | 0                        | 13          |
| Merten, 2016 [38]      | 4                               | 1                                | 2                          | 0                               | 0                                | 0                        | 7           |
| Pathak, 2016 [39]      | 17                              | 2                                | 0                          | 0                               | 0                                | 0                        | 19          |
| Piccardo, 2016 [40]    | 13                              | 5                                | 0                          | 0                               | 0                                | 0                        | 18          |
| Nguyen, 2018 [41]      | 18                              | 9                                | 0                          | 1                               | 2                                | 1                        | 31          |
| Overall (n)            | 77                              | 20                               | 5                          | 2                               | 2                                | 1                        | 107         |

Legend: In Nguyen, 2018 three malignant nodules had unknown <sup>18</sup>F-FDG uptake and were excluded from the analysis.

**Table S2:** Final diagnosis of included benign thyroid nodules.

| First author, year     | Follicular adenoma (n) | Nodular hyperplasia (n) | Hürthle cell adenoma (n) | Tumor with uncertain malignant potential (n) | Multi nodular goiter (n) | Lymphocytic thyroiditis (n) | Other (n) | Overall (n) |
|------------------------|------------------------|-------------------------|--------------------------|----------------------------------------------|--------------------------|-----------------------------|-----------|-------------|
| Mitchell, 2005 [34]    | 16                     | 0                       | 1                        | 0                                            | 6                        | 0                           |           | 23          |
| Hales, 2008 [35]       | 0                      | 2                       | 0                        | 0                                            | 2                        | 2                           | 2         | 8           |
| Deandreis, 2012 [36]   | 21                     | 0                       | 11                       | 12                                           | 0                        | 0                           | 0         | 46          |
| Muñoz Pérez, 2013 [37] | 6                      | 20                      | 5                        | 0                                            | 0                        | 2                           | 0         | 33          |
| Merten, 2016 [38]      | -                      | -                       | -                        | -                                            | -                        | -                           | -         | 44          |
| Pathak, 2016 [39]      | 23                     | 0                       | 8                        | 0                                            | 0                        | 0                           | 0         | 31          |
| Piccardo, 2016 [40]    | 21                     | 48                      | 0                        | 0                                            | 0                        | 0                           | 0         | 69          |
| Nguyen, 2018 [41]      | -                      | -                       | -                        | -                                            | -                        | -                           | -         | 77          |
| Overall (n)            | 87                     | 70                      | 25                       | 12                                           | 8                        | 4                           | 0         | 331         |

Legend: In Nguyen, 2018 four benign nodules had unknown <sup>18</sup>F-FDG uptake and thus excluded from the analysis; - = not reported.

**Table S3:** Size of included thyroid nodules with indeterminate FNA.

| First author, year     | Median (mm) | Range (mm) | Mean (mm) | Standard deviation (mm) |
|------------------------|-------------|------------|-----------|-------------------------|
| Mitchell, 2005 [34]    | -           | -          | -         | -                       |
| Hales, 2008 [35]       | -           | 1-53       | -         | -                       |
| Deandreis, 2012 [36]   | 21          | 10-57      | -         | -                       |
| Muñoz Pérez, 2013 [37] | -           | 10-85      | 28        | -                       |
| Merten, 2016 [38]      | 18          | 8-74       | -         | -                       |
| Pathak, 2016 [39]      | -           | -          | 26        | 13                      |
| Piccardo, 2016 [40]    | 20          | 13-30      | -         | -                       |
| Nguyen, 2018 [41]      | 31          | 9-136      | -         | -                       |

Legend: - = not reported.

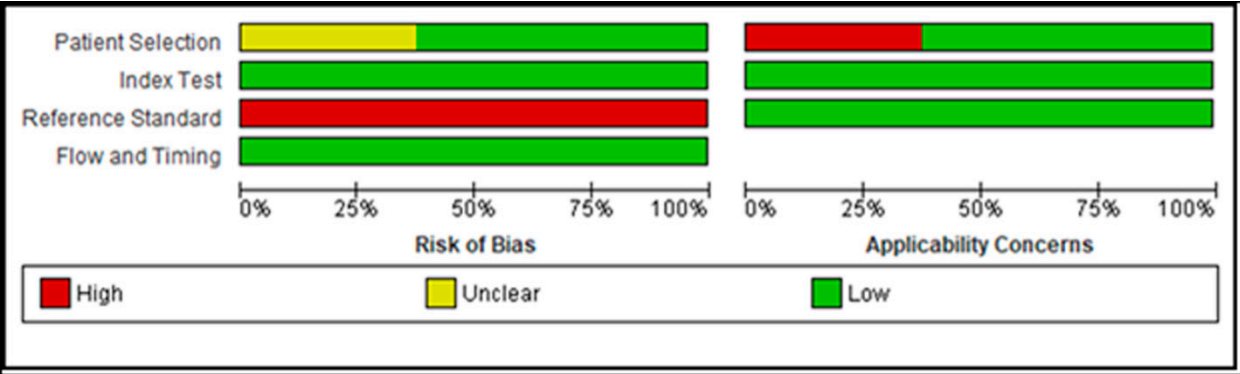

**Figure S1.** Risk of bias and applicability concerns graph: review authors' judgements about each domain presented as percentages across included studies.

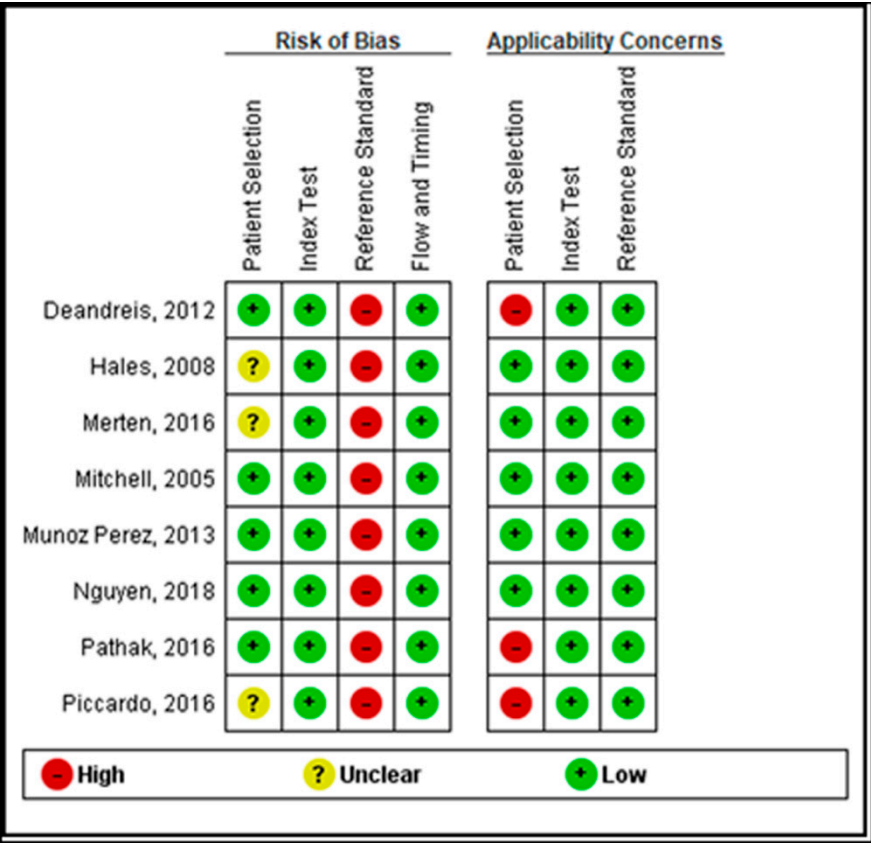

**Figure S2.** Risk of bias and applicability concerns summary: review authors' judgements about each domain for each included study.
